# Supplementary material for: The Application of Extraperitoneal Ostomy Combined with Pelvic Peritoneal Reconstruction in Laparoscopic Abdominoperineal Resection for Rectal Cancer
Source: Gastroenterol Res Pract. 2019 Feb 5;2019:3015958. doi: 10.1155/2019/3015958 (PMC6379842; doi:10.1155/2019/3015958)
Supplement: Supplementary Materials — The clinic characteristics of 38 patients with low rectal cancer (original data). [file 3015958.f1.xls]

## Sheet: Sheet1
The clinic characteristics of 38 patients with low rectal cancer（Original data）
Patients	Sex	Age	Operation time (min)	Blood loss (ml)	Positive lymph nodes	TNM stage	Hospital stay (days)	Postoperative hospital stay (days)	Complication
P1	F	41	145	50	0	T3N0M0	10	7	NO
P2	M	71	140	50	0	T3N0M0	13	11	NO
P3	M	61	160	20	3	T3N0M0	14	12	NO
P4	M	57	145	50	1	T3N0M0	13	12	NO
P5	M	59	158	50	0	T2N0M0	13	11	NO
P6	F	58	150	100	0	T3N0M0	13	12	NO
P7	F	62	140	200	0	T2N0M0	14	11	NO
P8	F	51	160	50	4	T3N0M0	14	12	NO
P9	F	47	160	100	0	T3N0M0	10	8	NO
P10	F	43	120	50	0	T2N0M0	11	9	NO
P11	M	60	140	50	14	T3N0M0	14	12	NO
P12	M	63	120	50	0	T2N0M0	13	11	NO
P13	M	58	165	50	0	T3N0M0	10	9	NO
P14	M	73	140	200	1	T3N0M0	13	12	NO
P15	M	50	155	50	1	T2N0M0	12	11	NO
P16	M	63	150	100	6	T3N0M0	14	12	NO
P17	F	67	100	50	1	T2N0M0	13	11	NO
P18	M	48	150	200	0	T2N0M0	14	12	NO
P19	M	53	155	50	3	T3N0M0	12	11	NO
P20	M	71	150	50	0	T3N0M0	13	12	NO
P21	M	51	140	10	0	T4N0M0	10	8	NO
P22	F	74	150	100	0	T4N0M0	13	11	NO
P23	M	89	125	50	0	T4N0M0	10	9	NO
P24	F	76	130	50	0	T4N0M0	11	9	NO
P25	M	75	120	50	0	T4N0M0	12	11	NO
P26	M	80	135	20	0	T4N0M0	12	10	NO
P27	M	58	120	30	0	T4N0M0	10	9	NO
P28	F	37	135	50	0	T4N0M0	12	11	NO
P29	M	51	125	70	0	T2N0M0	12	10	NO
P30	M	57	110	80	0	T2N0M0	8	6	NO
P31	M	49	170	100	2	T4N0M0	9	7	NO
P32	F	69	140	50	0	T4N0M0	11	10	NO
P33	M	71	145	110	0	T3N0M0	11	9	NO
P34	M	73	175	100	0	T3N0M0	12	11	NO
P35	M	50	150	50	0	T3N0M0	12	11	NO
P36	F	43	135	50	0	T2N0M0	11	9	NO
P37	M	55	145	200	0	T3N0M0	11	10	NO
P38	M	68	150	100	7	T4N0M0	13	11	NO
